# Supplementary material
Source: publisher figshare collection journal article supplement (https://gsajournals.figshare.com/ndownloader/files/15456002)
Supplement: Supplementary file 1 [file 15456002]

## Sheet: SuppTable.Obesity.PheWAS.Result
phenotype	description	beta	SE	OR	p	n_total	n_cases	n_controls
278	Obesity, Overweight	5.33691	0.216759	207.869	7.46054e-134	2821	852	1969
401	Hypertension	2.06688	0.121042	7.90016	2.24854e-65	2761	851	1910
401.1	Essential Hypertension	2.05287	0.12165	7.79026	6.83606e-64	2752	844	1908
327.3	Sleep Apnea	2.61237	0.191632	13.6314	2.57597e-42	2546	814	1732
250.4	Abnormal glucose	1.86541	0.140992	6.45857	5.83956e-40	2678	738	1940
512	Other symptoms of respiratory system	1.3033	0.102554	3.68143	5.30534e-37	2367	746	1621
272	Disorders of lipoid metabolism	1.19155	0.105031	3.29219	7.8773e-30	2693	854	1839
272.1	Hyperlipidemia	1.19155	0.105031	3.29219	7.8773e-30	2693	854	1839
327.32	Obstructive Sleep Apnea	3.13185	0.279195	22.9164	3.34819e-29	2469	758	1711
495	Asthma	1.23834	0.120662	3.44988	1.03585e-24	2405	722	1683
250.42	Other abnormal glucose	1.91919	0.193595	6.81546	3.63797e-23	2539	649	1890
250.41	Impaired fasting glucose	1.76068	0.179828	5.81639	1.23166e-22	2556	655	1901
530.11	GERD	1.24042	0.13301	3.45707	1.10189e-20	2560	797	1763
530.1	Esophagitis	1.19721	0.128468	3.31086	1.17326e-20	2583	807	1776
530	Diseases of esophagus	1.09565	0.124947	2.99111	1.80426e-18	2600	809	1791
512.9	Other dyspnea	1.73452	0.198118	5.66622	2.04118e-18	1922	516	1406
278.1	Obesity	8.52322	1.00218	5030.23	1.82132e-17	2781	836	1945
278.4	Abnormal weight gain	2.66874	0.317117	14.4218	3.90818e-17	2225	264	1961
261.4	Vitamin D deficiency	0.845552	0.107069	2.32926	2.85119e-15	2617	840	1777
261	Vitamin deficiency	0.825839	0.104648	2.2838	2.98272e-15	2646	852	1794
296	Mood disorders	0.984084	0.126061	2.67536	5.88477e-15	2270	713	1557
296.2	Depression	1.01746	0.134196	2.76615	3.40586e-14	2230	695	1535
512.7	Shortness of breath	1.3358	0.185616	3.80305	6.17333e-13	1931	509	1422
782.3	Edema	1.60247	0.223314	4.9653	7.18374e-13	2839	907	1932
745	Pain in joint	0.676608	0.0951484	1.96719	1.15141e-12	2657	875	1782
743	Osteoporosis, osteopenia and pathological fracture	-1.1918	0.180718	0.303674	4.25875e-11	2882	950	1932
571	Chronic liver disease and cirrhosis	2.10234	0.319272	8.1853	4.55516e-11	2682	794	1888
497	Bronchitis	1.88392	0.287206	6.57925	5.40003e-11	2120	574	1546
250	Diabetes Mellitus	6.42142	1.00365	614.873	1.5737e-10	2596	749	1847
571.5	Other chronic nonalcoholic liver disease	2.27017	0.356824	9.68107	1.98927e-10	2675	790	1885
300	Anxiety, phobic and dissociative disorders	0.689593	0.108865	1.9929	2.3827e-10	2412	751	1661
495.2	Asthma with exacerbation	1.88633	0.304999	6.59509	6.22225e-10	2113	569	1544
740	Osteoarthrosis	0.928037	0.150393	2.52954	6.79599e-10	2791	878	1913
743.9	Osteopenia or other disorder of bone and cartilage	-1.39681	0.227332	0.247384	8.02861e-10	2801	931	1870
465	Acute upper respiratory infections	0.582905	0.0978562	1.79123	2.573e-09	2308	752	1556
681	Superficial cellulitis and abscess	1.06032	0.178818	2.88731	3.03622e-09	2776	899	1877
256	Ovarian dysfunction	2.07248	0.354867	7.94451	5.21509e-09	2757	870	1887
539	Bariatric surgery	3.04867	0.527328	21.0872	7.41045e-09	2960	951	2009
244.4	Hypothyroidism NOS	0.707733	0.122492	2.02939	7.56858e-09	2632	839	1793
512.8	Cough	0.900414	0.15904	2.46062	1.50007e-08	1982	516	1466
256.4	Polycystic ovaries	2.17869	0.386673	8.83472	1.75614e-08	2752	867	1885
272.12	Hyperglyceridemia	2.00258	0.36087	7.40818	2.86785e-08	1906	476	1430
244	Hypothyroidism	0.645397	0.116772	1.90674	3.25825e-08	2678	854	1824
960	Poisoning by antibiotics	1.20436	0.223088	3.33462	6.7172e-08	2545	789	1756
464	Acute sinusitis	0.806707	0.150625	2.24052	8.52177e-08	1837	576	1261
NA	NA	0.550791	0.104955	1.73462	1.53854e-07	2835	921	1914
740.1	Osteoarthritis; localized	0.970803	0.185851	2.64006	1.75515e-07	2699	830	1869
300.1	Anxiety disorder	0.619699	0.119811	1.85837	2.31233e-07	2317	704	1613
722	Intervertebral disc disorders	0.738098	0.14302	2.09195	2.45913e-07	2660	836	1824
274.1	Gout	2.47947	0.486014	11.9349	3.36744e-07	2975	975	2000
274	Gout and other crystal arthropathies	2.2943	0.450477	9.91747	3.52358e-07	2976	975	2001
112	Candidiasis	1.43666	0.282323	4.20663	3.60511e-07	2791	896	1895
687.4	Disturbance of skin sensation	0.827672	0.165757	2.28799	5.93621e-07	2429	780	1649
452	Other venous embolism and thrombosis	1.35405	0.273587	3.87306	7.45083e-07	2667	850	1817
743.1	Osteoporosis	-1.42561	0.292271	0.240361	1.07322e-06	2735	920	1815
418	Nonspecific chest pain	0.561019	0.119707	1.75246	2.77772e-06	2768	899	1869
338.2	Chronic pain	0.507261	0.108705	1.66074	3.06497e-06	2800	902	1898
585	Renal failure	1.01981	0.218896	2.77267	3.17933e-06	2764	889	1875
272.11	Hypercholesterolemia	0.786631	0.169597	2.19599	3.51388e-06	2056	531	1525
351	Other peripheral nerve disorders	1.1339	0.244571	3.10775	3.54758e-06	2803	888	1915
246	Other disorders of thyroid	0.931254	0.201078	2.53769	3.63359e-06	2393	731	1662
585.1	Acute renal failure	1.57763	0.347245	4.84345	5.53898e-06	2713	864	1849
841	Sprains and strains of back and neck	0.84814	0.186983	2.3353	5.73523e-06	2491	806	1685
479	Other upper respiratory disease	1.17294	0.259868	3.23149	6.37288e-06	1941	584	1357
476	Allergic rhinitis	0.616535	0.138272	1.8525	8.23977e-06	2130	659	1471
483	Acute bronchitis and bronchiolitis	1.57307	0.353513	4.82145	8.5939e-06	2512	754	1758
286.2	Encounter for long-term (current) use of anticoagulants	1.33913	0.302392	3.81574	9.49057e-06	2769	894	1875
716	Other arthropathies	0.859808	0.194442	2.36271	9.78286e-06	2536	786	1750
573.9	Abnormal serum enzyme levels	1.31431	0.297953	3.72217	1.02837e-05	2674	780	1894
272.13	Mixed hyperlipidemia	0.918078	0.209679	2.50447	1.19509e-05	1978	502	1476
550.2	Diaphragmatic hernia	1.31553	0.306049	3.72674	1.71996e-05	2811	890	1921
720	Spinal stenosis	0.953131	0.222176	2.59382	1.78683e-05	2521	774	1747
716.9	Arthropathy NOS	0.864276	0.202564	2.37329	1.98408e-05	2526	781	1745
939	Atopic/contact dermatitis due to other or unspecified	0.962121	0.226346	2.61724	2.13142e-05	2392	771	1621
562	Diverticulosis and diverticulitis	1.08042	0.254998	2.94593	2.26535e-05	2546	808	1738
475	Chronic sinusitis	0.65415	0.155415	1.92351	2.56439e-05	2068	633	1435
427	Cardiac dysrhythmias	0.511646	0.12174	1.66804	2.63637e-05	2695	859	1836
452.2	Deep vein thrombosis [DVT]	1.74126	0.414594	5.70454	2.67002e-05	2636	832	1804
743.11	Osteoporosis NOS	-1.40467	0.338886	0.245447	3.39859e-05	2709	916	1793
401.3	Other hypertensive complications	2.04932	0.499136	7.76265	4.03021e-05	2247	515	1732
760	Back pain	0.429615	0.1052	1.53667	4.43057e-05	2707	866	1841
798	Malaise and fatigue	0.410685	0.100594	1.50785	4.45337e-05	2711	875	1836
764	Sciatica	0.730585	0.181373	2.0763	5.62335e-05	2698	837	1861
296.22	Major depressive disorder	0.928469	0.230757	2.53063	5.73182e-05	2043	595	1448
276.1	Electrolyte imbalance	0.612505	0.152254	1.84505	5.74838e-05	2798	900	1898
626	Disorders of menstruation and other abnormal bleeding from female genital tract	0.624711	0.155386	1.86771	5.81054e-05	2413	808	1605
740.11	Osteoarthrosis, localized, primary	0.801442	0.200108	2.22875	6.20065e-05	2677	813	1864
761	Cervicalgia	0.63092	0.158473	1.87934	6.85554e-05	2790	918	1872
626.1	Irregular menstrual cycle/bleeding	0.669619	0.169721	1.95349	7.96616e-05	2373	793	1580
276	Disorders of fluid, electrolyte, and acid-base balance	0.567059	0.144013	1.76307	8.23166e-05	2823	909	1914
789	Nausea and vomiting	0.545191	0.138788	1.72494	8.55793e-05	2724	880	1844
642	Hypertension complicating pregnancy, childbirth, and the puerperium	2.51098	0.639261	12.317	8.56764e-05	2985	977	2008
509	Respiratory failure, insufficiency, arrest	1.30027	0.332895	3.67029	9.38558e-05	2871	921	1950
763	Thoracic or lumbosacral neuritis or radiculitis, unspecified	0.800255	0.205454	2.22611	9.81733e-05	2668	825	1843
740.9	Osteoarthrosis NOS	0.866524	0.223506	2.37863	0.000105768	2655	804	1851
496	Chronic airway obstruction	0.977233	0.252808	2.65709	0.000110855	2129	567	1562
722.6	Degeneration of intervertebral disc	0.695197	0.180401	2.0041	0.000116384	2569	791	1778
550	Abdominal hernia	0.727862	0.192354	2.07065	0.000154349	2878	917	1961
416	Cardiomegaly	2.35972	0.631911	10.588	0.000188265	2849	893	1956
594	Urinary calculus	0.759588	0.204978	2.1374	0.0002108	2920	952	1968
949	Allergies, other	0.746597	0.201769	2.10981	0.000215374	2414	778	1636
681.7	Cellulitis and abscess of trunk	1.49767	0.408133	4.47128	0.000242956	2667	839	1828
338.1	Acute pain	1.18059	0.321814	3.25631	0.000243925	2411	739	1672
480	Pneumonia	0.805878	0.222288	2.23866	0.000288543	2561	772	1789
512.1	Wheezing	2.35742	0.661961	10.5636	0.000369075	1808	442	1366
681.5	Cellulitis and abscess of leg, except foot	1.60534	0.452652	4.97955	0.000390357	2663	837	1826
721	Spondylosis and allied disorders	0.666275	0.188245	1.94697	0.000401024	2555	783	1772
512.2	Painful respiration	1.15885	0.330336	3.18626	0.000451346	1833	451	1382
496.21	Obstructive chronic bronchitis	2.69168	0.77249	14.7564	0.000493213	2073	543	1530
285	Other anemias	0.584802	0.168051	1.79464	0.000501572	2699	863	1836
110	Dermatophytosis / Dermatomycosis	1.31765	0.379159	3.73465	0.000510467	2765	879	1886
532	Dysphagia	0.883364	0.255364	2.41902	0.000541702	2342	664	1678
626.13	Irregular menstrual cycle	1.4679	0.427968	4.34012	0.000603725	2231	736	1495
381	Otitis media and Eustachian tube disorders	0.611632	0.178432	1.84344	0.000608458	2651	850	1801
496.2	Chronic bronchitis	1.84403	0.538264	6.32194	0.000612816	2077	544	1533
261.2	Vitamin B-complex deficiencies	0.976483	0.285901	2.6551	0.000636751	2176	626	1550
415	Pulmonary heart disease	1.1089	0.325522	3.03102	0.000657959	2871	902	1969
876	Posttraumatic wound infection not elsewhere classified	1.61169	0.478515	5.01125	0.000756891	2627	885	1742
840	Sprains and strains	0.5426	0.161728	1.72047	0.000793587	2538	819	1719
257	Testicular dysfunction	1.36847	0.414423	3.92934	0.000959602	2742	857	1885
110.1	Dermatophytosis	1.30214	0.398227	3.67714	0.0010761	2762	877	1885
574.1	Cholelithiasis	0.946547	0.291801	2.5768	0.00117941	2863	914	1949
395.1	Nonrheumatic mitral valve disorders	-1.1392	0.35137	0.320074	0.00118621	2733	871	1862
433.2	Occlusion of cerebral arteries	1.68611	0.520214	5.39847	0.0011903	2858	931	1927
288.1	Decreased white blood cell count	-1.03421	0.319592	0.355508	0.00121209	2582	818	1764
770	Myalgia and myositis unspecified	0.697404	0.217561	2.00853	0.00134806	2849	915	1934
382	Otalgia	1.1279	0.352785	3.08915	0.00138808	2548	809	1739
274.11	Gouty arthropathy	3.30549	1.03615	27.2619	0.00142184	2954	958	1996
327	Sleep disorders	0.450602	0.141572	1.56926	0.00145831	2572	719	1853
257.1	Testicular hypofunction	1.32406	0.417797	3.75867	0.00152881	2741	856	1885
726	Peripheral enthesopathies and allied syndromes	0.529621	0.167712	1.69829	0.00158901	2594	805	1789
340	Migraine	0.453771	0.144405	1.57424	0.00167603	2794	894	1900
733	Other disorders of bone and cartilage	-1.06941	0.340565	0.343209	0.00168877	2529	825	1704
722.1	Displacement of intervertebral disc	0.768723	0.245122	2.15701	0.00171223	2501	758	1743
574	Cholelithiasis and cholecystitis	0.792707	0.254804	2.20937	0.00186424	2878	920	1958
427.2	Atrial fibrillation and flutter	0.838738	0.269908	2.31344	0.0018868	2422	746	1676
433.21	Cerebral artery occlusion, with cerebral infarction	1.62744	0.524674	5.09082	0.00192343	2857	930	1927
244.2	Acquired hypothyroidism	0.629737	0.205457	1.87712	0.00217628	2388	721	1667
562.1	Diverticulosis	1.14352	0.373243	3.13779	0.0021859	2510	787	1723
765	Cervical radiculitis	0.847343	0.277019	2.33344	0.00222234	2621	801	1820
649	Other conditions or status of the mother complicating pregnancy, childbirth, or the puerperium	1.33565	0.43813	3.80245	0.00229977	2953	964	1989
300.9	Posttraumatic stress disorder	1.81357	0.595838	6.13229	0.00233668	1977	565	1412
720.1	Spinal stenosis of lumbar region	0.811688	0.26689	2.25171	0.00235573	2491	755	1736
585.3	Chronic renal failure [CKD]	0.880611	0.290531	2.41237	0.00243716	2723	864	1859
960.2	Allergy/adverse effect of penicillin	1.11252	0.368324	3.04202	0.00252364	2488	755	1733
276.14	Hypopotassemia	0.550552	0.185008	1.73421	0.00292199	2731	866	1865
427.21	Atrial fibrillation	0.826098	0.2801	2.28439	0.00318497	2417	743	1674
182	Malignant neoplasm of uterus	2.24782	0.777104	9.46708	0.00382114	2760	913	1847
771.1	Swelling of limb	1.43643	0.496951	4.20566	0.00384646	2844	913	1931
411.2	Myocardial infarction	0.929749	0.321947	2.53387	0.00387829	2836	910	1926
280	Iron deficiency anemias	0.785677	0.272384	2.19389	0.00392107	2599	818	1781
381.1	Otitis media	0.656796	0.228313	1.9286	0.00401805	2595	826	1769
721.1	Spondylosis without myelopathy	0.560342	0.196069	1.75127	0.00426475	2545	775	1770
465.2	Acute pharyngitis	0.395087	0.140463	1.48451	0.00491207	1906	575	1331
783	Fever of unknown origin	0.718453	0.256621	2.05126	0.00511561	2815	915	1900
585.33	Chronic Kidney Disease, Stage III	0.872237	0.312065	2.39226	0.00518925	2716	860	1856
696	Psoriasis and related disorders	1.63725	0.587074	5.141	0.00528996	2749	895	1854
696.4	Psoriasis	1.63725	0.587074	5.141	0.00528996	2749	895	1854
426	Cardiac conduction disorders	0.631037	0.227346	1.87956	0.00550893	2445	753	1692
519	Other diseases of respiratory system, not elsewhere classified	1.01653	0.368536	2.76358	0.00581054	2824	913	1911
509.8	Dependence on respirator [Ventilator] or supplemental oxygen	1.61409	0.58864	5.02333	0.00610528	2844	904	1940
280.1	Iron deficiency anemias, unspecified or not due to blood loss	0.826858	0.303035	2.28613	0.00636064	2588	813	1775
580	Nephritis; nephrosis; renal sclerosis	2.8828	1.05654	17.8642	0.00636158	2682	844	1838
781	Symptoms involving nervous and musculoskeletal systems	1.7946	0.661416	6.01706	0.0066623	2939	957	1982
994.2	Sepsis	1.10813	0.411716	3.02869	0.00711335	2966	968	1998
977	Personal history of allergy to medicinal agents	2.13369	0.79357	8.44601	0.00717248	2467	745	1722
288	Diseases of white blood cells	0.631182	0.235164	1.87983	0.00727465	2582	843	1739
327.7	Sleep related movement disorders	1.06431	0.398427	2.89885	0.00755613	2345	637	1708
626.11	Absent or infrequent menstruation	1.13214	0.424694	3.10228	0.00768117	2230	733	1497
288.2	Elevated white blood cell count	0.637369	0.2413	1.8915	0.00825653	2578	841	1737
594.3	Calculus of ureter	1.19427	0.453161	3.30113	0.0084035	2841	914	1927
495.1	Chronic obstructive asthma	2.829	1.08238	16.9286	0.00895734	2067	538	1529
255	Disorders of adrenal glands	1.26587	0.487263	3.54619	0.00937879	2732	849	1883
580.3	Nephritis and nephropathy without mention of glomerulonephritis	2.75318	1.06353	15.6925	0.00963297	2681	843	1838
580.31	Nephritis and nephropathy in diseases classified elsewhere	2.75318	1.06353	15.6925	0.00963297	2681	843	1838
994	Sepsis and SIRS	0.99422	0.385381	2.70262	0.00988463	2969	969	2000
772.3	Muscle weakness	2.03425	0.793211	7.6465	0.0103302	2795	890	1905
277	Other disorders of metabolism	1.74045	0.680121	5.69988	0.0104967	2880	908	1972
785	Abdominal pain	0.254397	0.0994991	1.28968	0.0105648	2671	859	1812
41.1	Staphylococcus infections	1.22344	0.479196	3.39886	0.0106767	2749	879	1870
611	Abnormal findings on mammogram or breast exam	-0.339682	0.133248	0.711997	0.0107956	2662	893	1769
269	Proteinuria	1.2949	0.510217	3.65062	0.011151	2925	950	1975
737	Curvature of spine	-1.13142	0.445852	0.322576	0.01116	2756	895	1861
327.1	Hypersomnia	2.7376	1.08182	15.4498	0.0113888	2326	629	1697
593	Hematuria	0.584466	0.231004	1.79403	0.0114026	2326	771	1555
519.8	Other diseases of respiratory system, NEC	1.29352	0.512322	3.6456	0.0115758	2810	906	1904
411.3	Angina pectoris	2.68143	1.06421	14.606	0.0117471	2803	893	1910
965	Poisoning by analgesics, antipyretics, and antirheumatics	2.7273	1.08298	15.2915	0.0117918	2464	743	1721
428	Congestive heart failure; nonhypertensive	1.06547	0.423414	2.90221	0.0118566	2925	949	1976
498	Acute bronchospasm	1.1564	0.463901	3.17847	0.012675	2079	542	1537
348	Other conditions of brain	1.6736	0.680325	5.33135	0.0138934	2747	876	1871
This is a table of the 191 phenotype groups (phecodes) reaching statistical significance (p<1.4x10-2) when associated to extreme obesity in our cohort.
Phecodes and their description, effect sizes (β) of the regression, standard error (SE), and p-values are included. Each phecode group contains at least 20 cases.
